# Supplementary material
Source: PubMed Central journal article supplement (PMC4130265)
Supplement: hvi-10-740-s01.pdf [file hvi-10-740-s01.pdf]

## **Supplemental Material to:**

**Hui Zhao, Zhi-Jie Lin, Shou-Jie Huang, Juan Li, Xiao-Hui Liu, Meng Guo, Jun Zhang, Ning-Shao Xia, Hui-Rong Pan, Ting Wu, and Chang-Gui Li**

**Correlation between ELISA and pseudovirion-based neutralisation assay for detecting antibodies against human papillomavirus acquired by natural infection or by vaccination**

**Human Vaccines & Immunotherapeutics 2013; 10(3)**

**<http://dx.doi.org/10.4161/hv.27619>**

**<http://www.landesbioscience.com/journals/vaccines/article/27619>**

## Natural Infection

## Vaccination

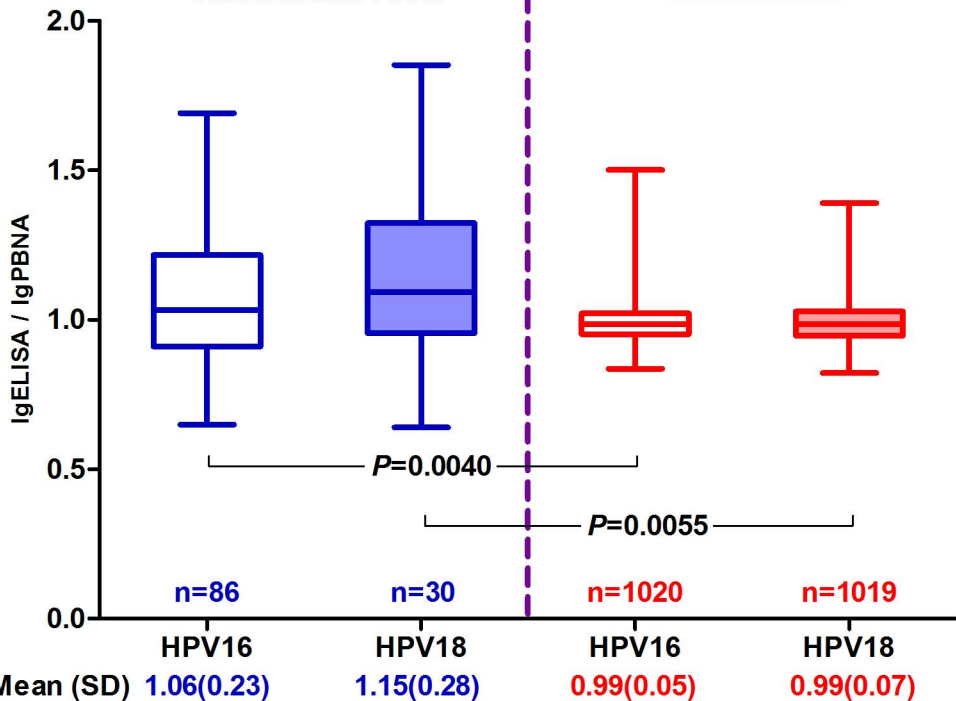

Supplementary:

Figure Legends:

Figure 1. The ratios of logarithmic antibody titres measured by the eVLP-based ELISA and the PBNA for Cecolin<sup>®</sup> vaccination induced and naturally acquired HPV antibodies. All the data showed in this figure are double positive samples. The lower edge, middle line and upper edge of each box mean the 25%, 50% and 75% value of relative ratios. The two horizontal lines outside each box mean the minimum and maximum value of relative ratios. Mean values and their standard deviation (SD) were shown under the figure. n: number of samples; PBNA, pseudovirion-based neutralisation assay; IgELISA/IgPBNA, ratio of logarithmic titres between ELISA and PBNA.

Table 1 The mean and quartile titers after natural infection and vaccination assessed by ELISA and PBNA.

|     | Natural infection induced antibodies |       |                     |              |       |                     | Cecolin <sup>®</sup> vaccination induced antibodies |        |                     |                |       |                     |
|-----|--------------------------------------|-------|---------------------|--------------|-------|---------------------|-----------------------------------------------------|--------|---------------------|----------------|-------|---------------------|
|     | HPV16 (n=86)                         |       |                     | HPV18 (n=30) |       |                     | HPV16 (n=1020)                                      |        |                     | HPV18 (n=1019) |       |                     |
|     | ELISA                                | PBNA  | lgELISA /<br>lgPBNA | ELISA        | PBNA  | lgELISA /<br>lgPBNA | ELISA                                               | PBNA   | lgELISA /<br>lgPBNA | ELISA          | PBNA  | lgELISA /<br>lgPBNA |
| Min | 20                                   | 20    | 1.00                | 20           | 20    | 1.00                | 553                                                 | 160    | 1.24                | 443            | 160   | 1.20                |
| 25% | 48.75                                | 35    | 1.09                | 45.75        | 20    | 1.28                | 4617                                                | 5120   | 0.99                | 3055           | 2560  | 1.02                |
| 50% | 75.5                                 | 80    | 0.99                | 75           | 60    | 1.05                | 7721                                                | 10240  | 0.97                | 5179           | 5120  | 1.00                |
| 75% | 152.3                                | 160   | 0.99                | 164.8        | 200   | 0.96                | 12310                                               | 10240  | 1.02                | 8899           | 10240 | 0.98                |
| Max | 977                                  | 640   | 1.07                | 1276         | 320   | 1.24                | 102296                                              | 163840 | 0.96                | 89830          | 81920 | 1.01                |
| GMT | 86.76                                | 77.46 | 1.03                | 91.3         | 60.63 | 1.10                | 7405                                                | 8403   | 0.99                | 5167           | 5815  | 0.99                |

PBNA, pseudovirion-based neutralisation assay; lgELISA/lgPBNA, ratio of logarithmic titres between ELISA and PBNA; GMT, geometric mean titre
